# Supplementary material for: Photocatalytic Degradation of Methylene Blue and Ortho-Toluidine Blue: Activity of Lanthanum Composites LaxMOy (M: Fe, Co, Ni)
Source: MDPI journal article supplement (doi:10.3390/catal12111313), 2022-10-26
Supplement: s1 [file s1]

# Photocatalytic Degradation of Methylene Blue and Ortho-Toluidine Blue: Activity of Lanthanum Composites $\text{La}_x\text{MO}_y$ (M: Fe, Co, Ni)

Mmabatho L. Mocwana <sup>1</sup>, Puseletso P. Mokoena <sup>1</sup>, Pontsho S. Mbule <sup>2</sup>, Isaac N. Beas <sup>3</sup>,  
Guy L. Kabongo <sup>2</sup>, Simon N. Ogugua <sup>4</sup> and Themba E. Tshabalala <sup>1,\*</sup>

<sup>1</sup> School of Natural and Applied Sciences, Sol Plaatje University,  
Kimberley 8300, South Africa

<sup>2</sup> Department of Physics, CSET, University of South Africa,  
Johannesburg 1710, South Africa

<sup>3</sup> Botswana Institute for Technology Research and Innovation (BITRI),  
Private Bag 0082, Gaborone, Botswana

<sup>4</sup> Department of Physics, University of the Free State, Bloemfontein 9300, South Africa

\* Correspondence: author: themba.tshabalala@spu.ac.za; Tel.: +27-53-491-0262

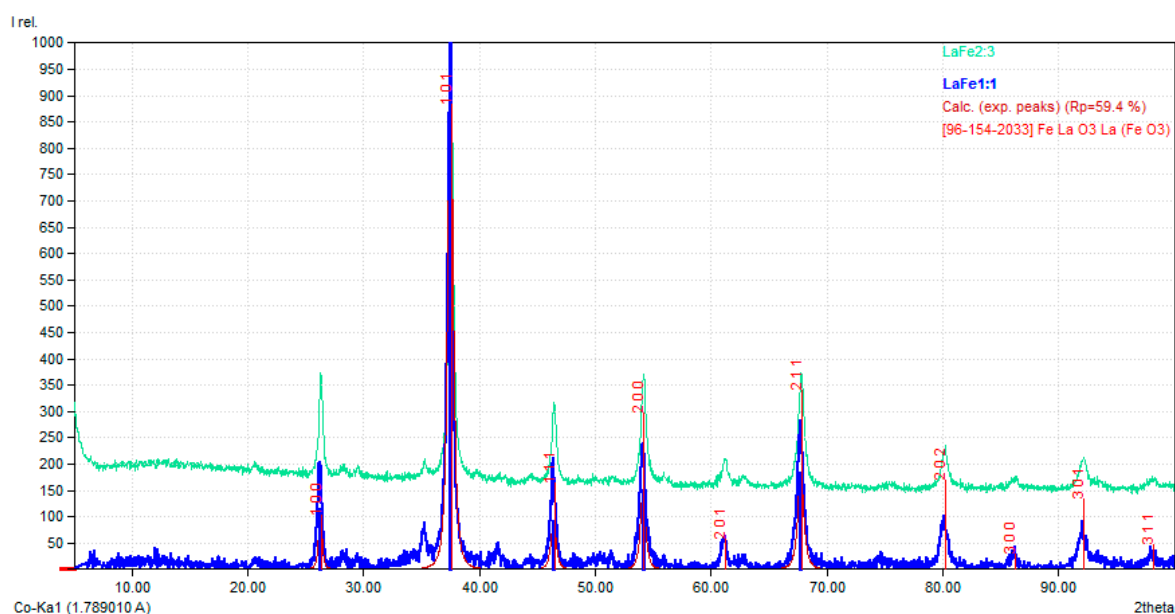

**Figure S1.** XRD patterns of  $\text{LaFeO}_3$  samples.



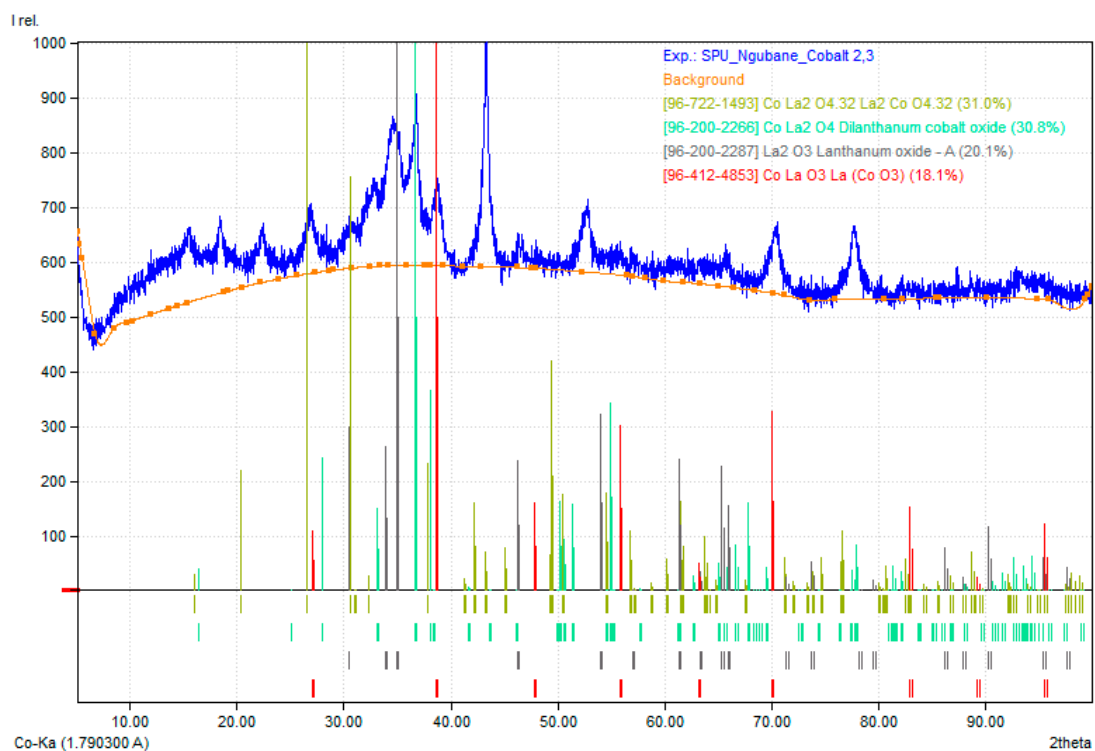

Figure S2. XRD pattern of the LaCoO<sub>3</sub> with 2:3 metal ratio.

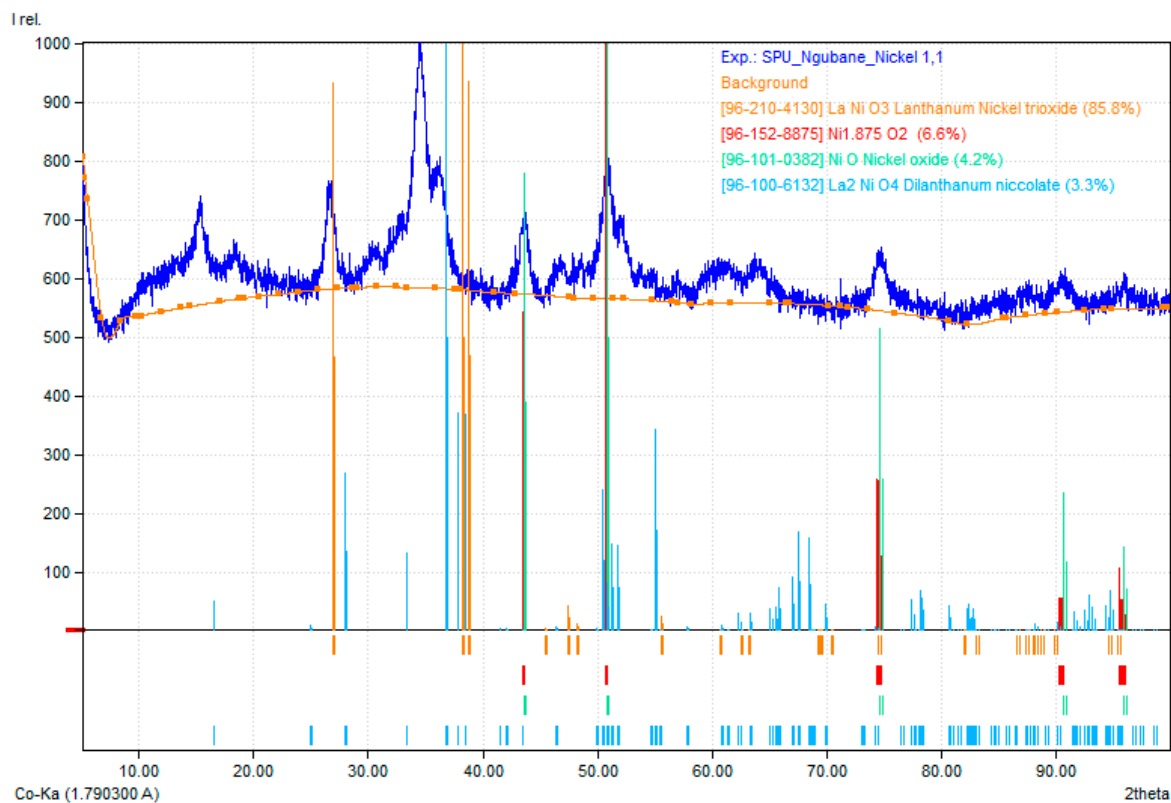

Figure S3. XRD pattern of the LaNiO<sub>3</sub> with 1:1 metal ratio.



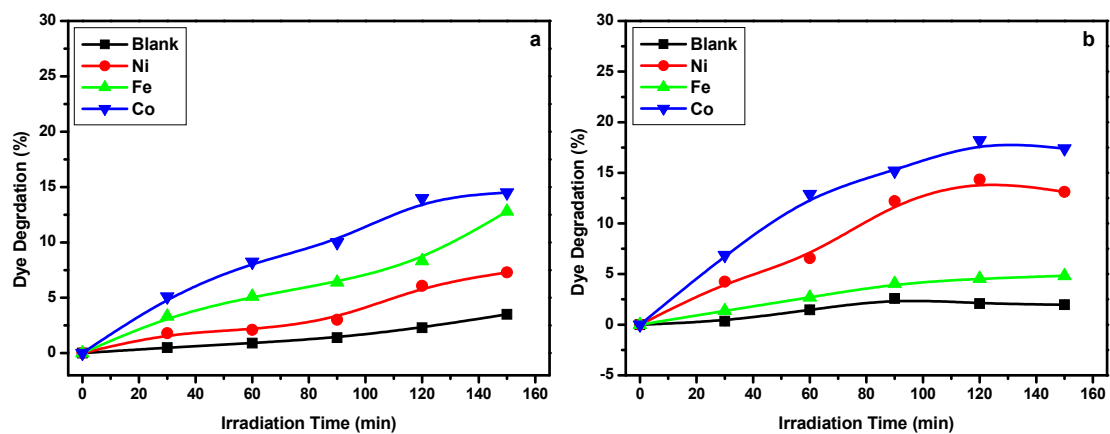

**Figure S4.** Photocatalytic degradation of MB and o-TB with 30 %  $\text{H}_2\text{O}_2$  under visible light irradiation, (a) o-TB, (b) MB with a metal ratio of ratio 2:4.
